# Supplementary material for: Persistence and Robustness of Lagrangian Coherent Structures
Source: Copernicus journal article supplement (doi:10.5194/egusphere-2024-1171), 2024-04-25
Supplement: Supplementary file [file egusphere-2024-1171-AC2-supplement.pdf]

## Answer to reviewer #2

We greatly appreciate your detailed reading and your comments on our manuscript. You have requested a number of clarifications, corrections and to some extent further analysis and discussion, all of which we are prepared to undertake.

*20 I would suggest you emphasize the sensitivity of trajectories and not the sensitivity of the velocity because even with a hypothetically perfect velocity, a small error in a trajectory's initial position can grow exponentially into large errors. The idea of your paper is to introduce perturbations in the velocity and measure how trajectories respond. Note the interest is in the trajectory response as visualized through LCS given a velocity ensemble spread. The main concern is trajectory uncertainty, even if explored in terms of velocity uncertainty.*

This is a good point and we will adapt this change in wording.

*In 35 you mention:*

*Previous studies often discuss the LCS methodology and their practical applications, but rarely touch upon the topic of LCS estimates being inherently affected by uncertainties in the velocity fields they aim to describe. Furthermore, short-lived flow features constantly develop, drift, and dissipate in real oceanic flow (Chen and Han, 2019). Given their time-dependency, LCSs might appear and disappear just as quickly. This brings up two important questions: (1) Given the velocity field uncertainty, how robust, i.e. predictable, are LCSs derived from ocean models at a particular time?; (2) Given their time-dependency, how persistent are LCS in ephemeral flows?*

*I don't think robust can be equated with predictable. Robust in your study means that different realizations of a simulation (i.e. similar simulations) result in the same LCS. There is no predictive capability (i.e. estimates of future information based on past information) in this analysis*

We agree that predictability does not directly follow from robustness. This would only be the case if the underlying circulation model is proven to have both predictive skill on both the time and the spatial scales of interest, and if the ensemble spread exhibits reliability. Both criteria are valid only to a limited extent in terms of surface currents, which has been investigated by Idzanovic et al. (2023) for the model system that is used here. Our study is interested in whether the EPS yields similar FTLE fields at a specific time, and does not focus on their predictability. This point will be clarified in the manuscript.

*The short-lived structures you mention are not a problem, or even interesting, as it is straightforward to filter them and find the prominent deformation patterns, without the need to average see e.g. Olascoaga & Haller (2012; <https://doi.org/10.1073/pnas.111857410>) or Kunz et al (<https://doi.org/10.5194/egusphere-2024-1215>) that discusses the importance of persistence when it comes to attracting hyperbolic patterns and the lack of meaningful influence with short-lived structures (in particular while hyperbolic structures are forming or decaying). These are results without ensembles or any type of averaging. In particular, Olascoaga & Haller (2012) get rid of short-lived LCS by increasing the integration time  $T$  to 15 days. Thus, the choice of  $T = 1$  day in your study raises the question of how do your*

*results depend on your choice of  $T$ ? Are the transient FTLE features that you filter through averaging unnecessarily increased by this choice? Wouldn't it be better to use a longer integration time to filter those features instead of time averaging? Also, as I will mention below, there are several papers showing 1) how to find persistent (or quasi-steady) LCS and 2) that persistent LCS are ubiquitous and meaningful. It is true however that we do want to be able to discern which are short-lived and not meaningful, and there is more than one way to get there.*

Reviewer #1 raised a similar concern about the integration period. The choice of 24 hours as integration period is not completely arbitrary but motivated by typical uses of ocean forecasting models. These are decision support tools for search-and-rescue operations, oil-spill modeling, ice-berg trajectory forecasts, and similar trajectory analysis which often require forecasts of a few hours up to a few days. But the comment is definitely warranted, and we will now provide an analysis figure with examples of various integration lengths for the FTLE (time-of-flow). The figure (in its current form) is added here, and it indicates that our results are not overly sensitive to the integration period within integration length of 12 hours to 72 hours. But we do see (and will discuss) some interesting differences. For example, for much longer integration periods of 15 to 30 days, we see that the FTLE analysis yields distinct linear features in low current velocity regions, especially in the deep basins off the continental slope. In contrast, in the energetic flow regions over the shelf and slope, longer integrations tend to smear out features. Our interpretation is that the ability of the FTLE field to pick up LCSs (in a broad sense) depends on the integration period matching the time scale of the dynamics—which varies depending on the environmental conditions.

We also compare FTLE analysis based on long integration periods with the time-average of several short integration periods and see distinct differences in the two approaches. Whereas the time-average provides a description of regions that are typically abundant with FTLE ridges, the long-time integrations do not distinguish areas in the high-velocity region but instead allow to better characterize low-velocity regions, which are less pertinent to time-critical contingency modeling.

We do not take an opinion on right or wrong time integration, but in the revised manuscript we like to discuss its impact on the analysis, and provide a view on how an appropriate time period may be selected depending on the application in focus. In our initial analysis, we did indeed experiment with different periods from one hour up to a few days, and some of these examples are presented below (see Fig. A).

*Schematic 2 is not correct, the average of any number of zeros is still zero, i.e. regions where FTLE is zero in the left side of the schematic should also be zero on the right. Notice that in the caption of Figure 2 you introduce a concept that is not mentioned, or used, in any other part of the paper and that is “the average region covered by them”. There must be a better way to convey the idea you want to convey.*

We agree that Fig. 2 is misleading and that structures like these do not appear in nature. This is also a concern that was raised by reviewer #1. The idea behind Fig. 2 was to show what FTLEs might look like over the ensemble dimension, where each drawn line represents FTLE ridges from different ensemble members. This is not shown clearly enough in neither the figure nor the text, and will be reworked.

40 should be Gulf Stream

This will be fixed.

40 The paper by Badza et al 2023 does not present reliable results (this is a paper that should have been rejected in my view) because:

*They use a stochastic differential equation for the velocity to measure the robustness of LCS methods to noise. This is a big mistake. The mathematical theory of variational LCS explicitly states the results are only valid for a deterministic velocity, i.e. the results only hold for the typical ordinary differential equation  $dx/dt = v(x(t),t)$ . This is a very basic, yet fundamental mistake that renders their results meaningless.*

*Even if the theory of hyperbolic LCS were to hold for a stochastic vector field, a stochastic component is not representative of the uncertainty typically encountered in a geophysical velocity field, neither simulated nor observed. An ensemble of simulations is a much better choice for uncertainty.*

*In their Gulf Stream case, they allow for a very long integration time (three months) while computing LCS within a limited spatial region, Thus the results are plagued by fictitious boundary effects, as is evident from their figures. A simple computation shows the inadequacy of their choice: Their domain is 30 degrees wide (note the flow is mainly west to east in their domain). That means their domain is less than  $30 \times 111 = 3330$  km wide. Yet their integration time is 90 days, which means you would only need a velocity of 37 km/day (0.43 m/s) to traverse the whole domain, from west to east. The Gulf Stream commonly reaches a velocity of over 150 km/day (above 1.5 m/s). Indeed, boundary effects in their results are apparent, and they mention it themselves: "Most of these streaks appear to look like diagonal lines, which is likely attributable again to the exodus of particles over the large period of flow considered." They also mention in their discussion that: "As with most of the previously discussed methods, this can be attributed to the exodus of particles from the domain over our 90 day flow period." Even without the two mistakes mentioned above, there is not much that can be learned from results plagued by unphysical boundary effects.*

*In your study, Badwa et al. 2023 are cited to say that hyperbolic LCS detection is not reliable. However, as explained above their conclusion is meaningless. I therefore, as a reviewer, make the extraordinary suggestion that you delete, or at least adequately discuss, any sentence citing the Badza et al. paper, to avoid amplifying misleading results. The other papers you cite such as Harrison & Glatzmaier are better and are adequate for the point you wish to make regarding FTLE. In particular, the representation of uncertainty they choose is realistic and does not involve a fundamental dynamical-systems mistake.*

Thank you for this comment. We did not realize this issue with Badza et al. (2023), and intend to remove the citation from our manuscript.

55 what do you mean by dynamically active shelf region? Is there such a thing as a dynamically inactive sea? Either explain clearly the idea you want to convey or delete statements that don't add useful information, yet leave the reader wondering.

What we meant here is that the shelf and slope region has more variability due to the presence of a complex coastline and the juxtaposition of different water masses (setting up frontal zones) that generate various forms of flow instability. We will clarify in a revised manuscript.

*In the caption of Figure 1 you mention Moskstraumen has been indicated by an arrow, consider mentioning in the text what is this region. why is it important?*

The velocity field through Moskstraumen is highly tidally dependent, and in a previous iteration of our manuscript, we investigated whether this yields periodic and thus predictable FTLE fields. As this is not included in the submitted manuscript we intend to update Fig. 1 and remove the arrows indicating Moskstraumen.

*100 Although it is true that fluid parcels need to be advected, Equation 3 is not an accurate description of how Equation 2 is computed. It needs to be clear that you are time-integrating the velocity along a path which is not the same as integrating the velocity with respect to time at a fixed location, as your equation suggests. Importantly, you need to integrate two trajectories to be able to compute the distance  $\partial x$ , and it is not enough to just integrate the velocity as your equation reads.*

We will take a look at Eq. 3 again and explain better how to obtain  $\Delta F$ .

*105 Although deformation is indeed given by the singular values of the Jacobian of a Flow map, there is no such information as a “speed of deformation” embedded in the Flow map (note speed has units distance/time).*

This will be fixed.

*110 there is nothing to show, that is the definition of FTLE.*

This will be fixed.

*115 “Largest FTLE = LCS” is not true. This needs to be explained in detail throughout the paper so that your conclusions are not misleading. See my comments about strong FTLE produced by large horizontal shear in coastal regions in what follows.*

The other reviewer also commented on this. We realize that the largest FTLE does not necessarily imply an LCS and that there are additional criteria which an FTLE ridge must satisfy to qualify as an LCS approximation. We intend to clarify this difference between FTLE and LCS in a revised manuscript, including remarks about the criteria needed to detect LCS from FTLE fields.

*125 “infinitesimally thin” is an unusual description. Although the width of a line within a plane indeed has measure zero, just like the width of a point within a line has measure zero, it is better to just say co-dimension 1 and leave it at that. In addition, co-dimension 1 is true for proper LCS, yet FTLE ridges tend to be coarse (as you suggest in your Figure 2 and other parts of the paper) and therefore your “infinitesimal” description is confusing. Best to omit this part.*

This is a good point, and we agree that saying “co-dimension 1” is better phrasing than “infinitesimally thin”. Furthermore, we agree that this only applies to LCS, whereas the FTLE is just a field of values, and as per the previous comment, we intend to make the distinction between FTLE and LCS more clear here as well.

*Line 152, you mention larger FTLE at initial time is due to a large velocity gradient, this suggests high FTLE is produced by the velocity horizontal shear in which case it is not an LCS. Also, if it is an LCS then attraction rather than accumulation would be better.*

Thank you for this remark. The note on a horizontal velocity shear is a good point, which we did not consider in our manuscript. While it is true that a horizontal velocity shear (shear dispersion) would yield large FTLE, this does not cause attraction/repulsion, and is therefore not an LCS. This brings us again back to the point that FTLE does not necessarily equate to LCS, which is a distinction that is lacking in our manuscript. We intend to discuss horizontal velocity shear in the revised manuscript.

*Line 160 you claim longer averaging periods effectively decrease variability. Although this makes sense intuitively, it is hard for me to see this by just looking at the figures. For example, there does not seem to be a large difference between the 7-day standard deviation and the 28-day one. Can you quantify this further?*

The idea here is that both the average and standard deviation appear to be concentrated with large values at particular locations (e.g. along the continental slope) for shorter time periods, but spreads out more throughout the domain for longer periods of time. Fig. 4 shows an example of this, whereas Fig. 9 intends to quantify this decrease in variability. We agree that this can be hard to see from Fig. 4, so this figure will be remade and we will consider presenting it alongside Fig. 9.

*Lines 167-168 can you discuss further the relation between a persistent current and persistent FTLE? Why is not surprising that they co-locate? Is it due to velocity shear?*

Thanks for the reminder; the text here will need some work. We are convinced that the underlying cause of both persistence and robustness (although we'll need to reconsider these terms) is the strong potential vorticity (PV) gradient set up by the steep continental slope. A steady current and recurring FTLEs are two of many results of this PV gradient. But, in relation to your cautionary point on shear dispersion, the velocity shear along the continental slope is probably a large contributor to FTLE formation here. This section will be expanded upon in a revised manuscript.

*Figure 6, some colors are saturated (especially e and f) so we can't get a sense of how large the values are, also the mean and the std deviation are not too far off, consider plotting them with the same scale (say 0.01 to 0.07 or whatever is needed so colors are not saturated over large regions). This will aid comparisons between mean and standard deviation.*

This will be fixed.

*172-173 It should be easy enough to test whether it is truly a transport barrier. How about releasing synthetic drifters on both sides of the barrier candidate and testing this directly? It would be nice to see results from individual members and some trajectory ensemble averages.*

This is a very nice suggestion which would aid our discussion. We have already started some Lagrangian particle calculations.

*Figure 9a, the legends for daily winter and summer seem the same color. Also, why do the spectra for ensemble members (c and d) seem to decrease monotonically from member 1 at the top to the last member on the bottom?*

The legends will be fixed. The spectral graphs are computed after first averaging over a set number of ensemble members. That is, the graph for “ensemble members = 1” is just showing the spectral variance from one ensemble member, but the graph for “ensemble members = 24” shows the spectral variance taken after first averaging all 24 ensemble members. The averaging effectively decreases variability over the domain. We realize that this section needs to be reworked as the exact method for obtaining the graphs is not clearly stated and confusing.

*Line 241 can you describe the dependence on the averaged members when only a few members are averaged?*

Here we pick the members at random, and there is a possibility that any member might deviate largely from the other members. When only picking a few members, e.g. four, there is a possibility that one of those might be largely different from the other three members. This can have a large impact on the calculated variability between these four members, and the results can differ if all four members are more similar. The impact on the results from one deviating member will be larger when few members are considered as opposed to when many members are considered.

*Line 242, it would be nice to see the three regions used for the spectra, as you mention, some circulation patterns are highly predictable for example circulation along a slope tends to be quite predictable along large portions of the slope.*

Good point. This will be included.

*Line 243 and 252, could it be that FTLE seems to be more robust than persistent due to your choice of  $T=1\text{day}$ ? Short  $T$  should be expected to result in more transient features relative to longer integration times. See for example the papers cited in the comments above for lines starting at 35.*

This could definitely be the case, and we will look more into it. As stated previously, we are motivated by typical applications which are on these time scales. However, we intend to conduct a proper analysis of the integration time.

*Line 276, a repelling and attracting LCS cannot be parallel at the same location, if you go back to Dong et al you will see they describe an attracting LCS*

Thank you, this is an error on our side.

277-278 and again we have the issue of  $T$  being relatively short at 1 day.

This will be discussed (as outlined above).

283 You mention other methods for detecting persistent LCS could yield more nuanced results. You also cite (line 343) a paper by Gouveia et al to say that large-scale features give rise to quasi-steady LCS. If you read the Gouveia et al paper carefully you will see they use a method to find quasi-steady LCS that was published in 2018 (<https://doi.org/10.1038/s41598-018-23121-y>). This later paper has over 40 citations according to Google Scholar, suggesting that many other studies are using that method to extract quasi-steady LCS. This topic is directly relevant to your study, so it seems your literature review is lacking. As you will see throughout my comments, the use of FTLE is a problematic issue that keeps coming up. The methodology published in 2018, and used by Gouveia et al, does not rely on FTLE, although there is some averaging. The difference in approach suggests a worthwhile discussion regarding the differences between that approach and your approach, including the strengths and weaknesses of each method.

While other methods provide better means to identify LCS as linear features, our reason for using FTLE fields is to obtain a gridded spatial description of Lagrangian transport characteristics that can be analyzed using simple statistical methods, e.g. to calculate a mean and standard deviation of FTLE fields. In addition, we see the FTLE analysis as a practical tool for use in operational applications (e.g. contingency modeling), and we want to highlight the potential use of FTLE analysis in operational oceanography. Nevertheless, we agree that there are problems with the FTLE, and are familiar with better and more modern approaches for detecting LCSs. A revised manuscript will be more careful about the connection between LCS and FTLE, and provide a more detailed discussion on shortcomings of FTLE analysis as opposed to methods that identify LCS as linear features, such as quasi-steady LCS.

288 it is also possible that a very strong FTLE shows up in the average, even if it does not persist much in time, especially if it recurs.

This is a good point, we'll bring it up.

358-359 Strong, persistent FTLE can be caused by persistent horizontal shear in which case it would not be indicative of LCS. Strong persistent FTLE can be expected in many coastal regions to be caused by horizontal shear. High FTLE next to the coastline, as in Fig. 5 during the summer or around 69.4N in the winter, for example, should be particularly suspect. You need to clarify throughout your paper that strong FTLE may be caused by horizontal shear, in which case FTLE is NOT indicative of an LCS, and mention that horizontal shear can be persistently high at certain locations such as a coastline. These locations, according to your suggestion, would have persistent LCS due to the persistent high FTLE, yet FTLE is not indicative of LCS if it is solely due to shear.

Clearly a good point. As outlined above, we will be more careful about the distinction between FTLE and LCS, and specifically mention the case of shear dispersion. We may also attempt to identify regions (at least illustrate by an example) where the FTLE is produced by velocity shear.

*It is not enough to mention FTLE ridges only approximate LCS and to reference where to find the distinction between the two (line 144), because this distinction directly impacts the interpretation of our results, as has been explained above.*

We intend to make changes in the manuscript to clearly distinguish between FTLE and LCS. Furthermore, we will highlight issues with the FTLE as a tool for LCS detection and discuss other LCS detection methods from literature.

382 *“...by combining LCS analysis with ensemble prediction methods.” The 2018 method to find quasi-steady LCS mentioned above should be discussed in this context as well. Can that method be used to find robust features in operational forecasting? Or is it complementary information to the ensemble methods you propose? Or are these two methods for differing purposes? Can you expand on how to use these methods to detect robust or persistent LCS in terms of operational oceanography? How concretely can these methods be applied? Can you suggest step-by-step instructions on how to implement these methods in an operational application? Can you give an example of how they have been used or can be used in operational oceanography? How feasible, useful, and accessible are these methods in operational oceanography?*

We will certainly expand on the possible operational uses/applications of FTLEs in an ensemble prediction system, possibly both in the introduction and conclusions. As for the 2018 method to find quasi-steady LCSs, we do not understand it well enough yet to be able to ascertain exactly how this method would respond to an ensemble average. However, as the 2018 paper handles time averages, we see the potential from an operational perspective of combining ensemble averaging with quasi-steady LCS to find robust features. We will not attempt to compute these in this study, but we intend to compare and discuss the two approaches in a revised manuscript. If a combined approach holds promise, we will strongly consider expanding on the use of ensemble models with quasi-steady LCS in a future study.



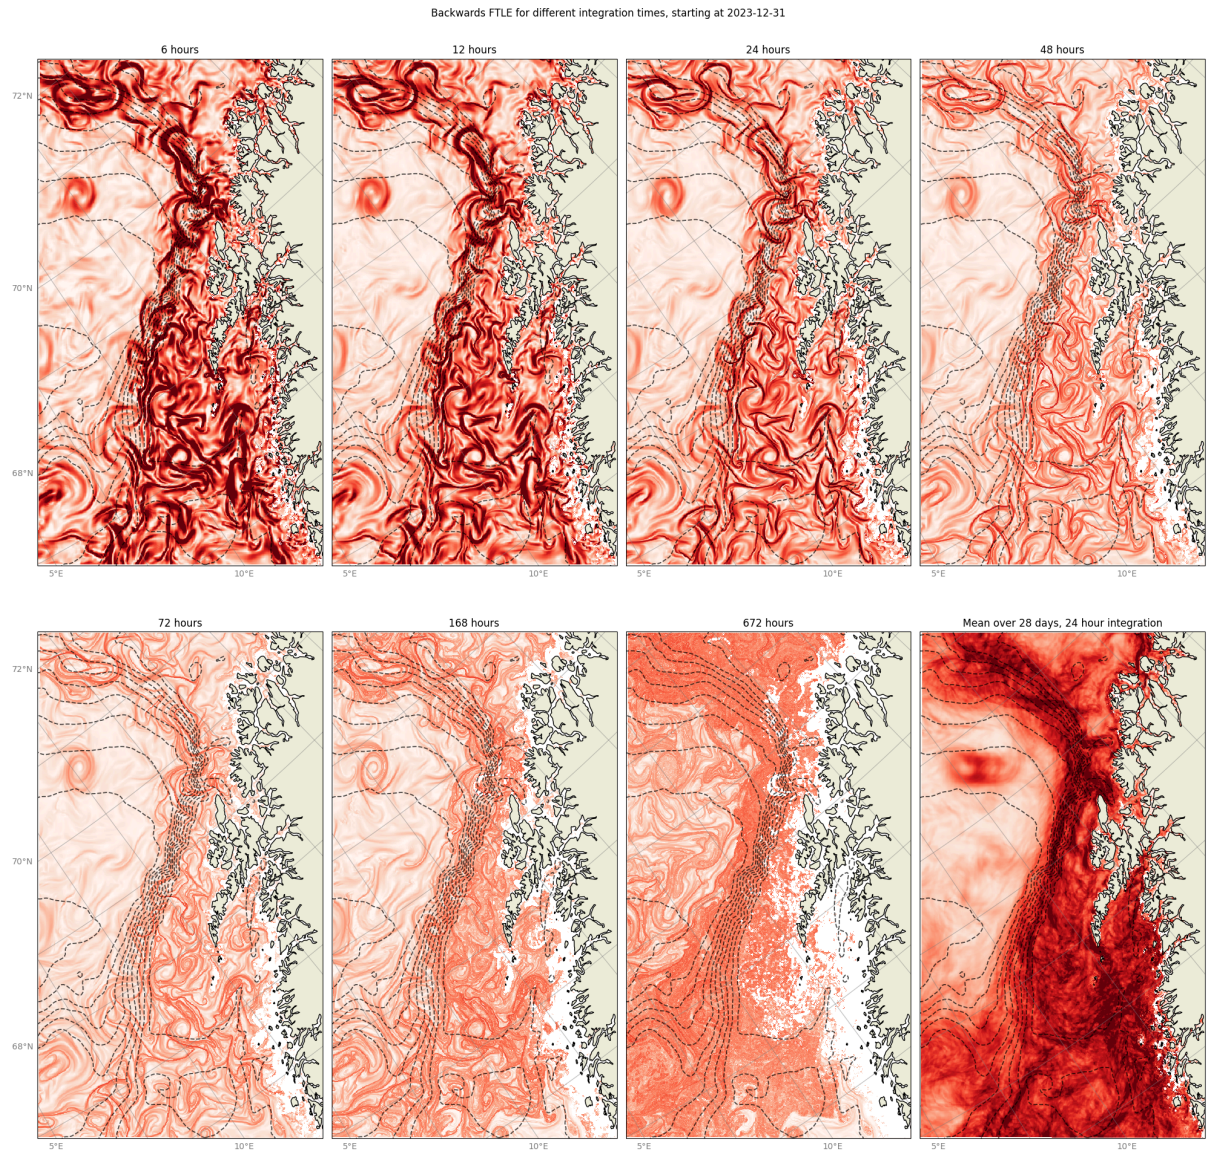

Fig. A: Backwards FTLE for different integration times (6, 12, 24, 48, 72, 168, and 672 hours). The final panel shows the monthly average of 24-hours long FTLE computations.
